# Supplementary material for: TV News and COVID-19: Media Influence on Healthy Behavior in Public Spaces
Source: PubMed Central journal article supplement (PMC7919256; doi:10.3390/ijerph18041879), 2021-02-15
Supplement: ijerph-18-01879-s001.pdf [file ijerph-18-01879-s001.pdf]

**Table S1.** EFA: Results and factors loadings for “Contagion in the red zones and its consequences”.

| Item                                                                    | Factor 1            | Factor 2             |
|-------------------------------------------------------------------------|---------------------|----------------------|
|                                                                         | Calming information | Alarming information |
| Infected people have usually only mild symptoms                         | .828                |                      |
| Even in red zones most people are fine                                  | .826                |                      |
| The very high number of people recovered from the infection             | .823                |                      |
| The infection does not produce any symptoms in the majority of people   | .806                |                      |
| Many suspected cases of contagion turned out to be negative             | .797                |                      |
| The very low number of infected people compared to the total population | .742                |                      |
| Dead people were already sick                                           | .667                |                      |
| The streets and squares almost empty in red zones                       |                     | .672                 |
| The assault on the supermarkets to make stocks of food                  |                     | .660                 |
| Blocking access to red zones                                            |                     | .656                 |
| People walking around in the street with protective masks               |                     | .655                 |
| The new cases of deaths in Italy                                        |                     | .607                 |
| Visits to Italy are not recommended for tourists                        |                     | .555                 |
| The first infected person (patient zero) has not been found yet         |                     | .492                 |
| Public transport almost empty in many cities                            |                     | .459                 |
| The long times for the availability of a vaccine against the virus      |                     | .449                 |
| The ease of the spreading of the virus                                  |                     | .438                 |
| The number of infected people in Italy                                  |                     | .438                 |
| The number of swab-tested people                                        |                     | .421                 |

Supplementary materials: TV news and COVID-19: Media influence on healthy behavior in public spaces, Scopelliti et al., 2021

---

|                    |       |       |
|--------------------|-------|-------|
| Eigenvalues        | 4.70  | 3.64  |
| Explained variance | 24.72 | 19.18 |
| Mean               | 3.02  | 4.35  |
| Cronbach's Alpha   | .90   | .78   |

---

**Table S2.** EFA: Results and factors loadings of “Preventive measures in green zones”.

| Item                                                                                                | Factor 1              | Factor 2          | Factor 3                   |
|-----------------------------------------------------------------------------------------------------|-----------------------|-------------------|----------------------------|
|                                                                                                     | Individual prevention | Social prevention | Institutional restrictions |
| The importance of washing your hands often                                                          | .843                  |                   |                            |
| The importance of covering your mouth when coughing or sneezing                                     | .842                  |                   |                            |
| The importance of not touching your eyes or mouth with your hands                                   | .813                  |                   |                            |
| The importance of keeping social distance interacting with people                                   | .520                  |                   |                            |
| The numbers to call in case of suspected contagion                                                  | .507                  |                   |                            |
| The importance of self-isolation if you think you are infected                                      | .461                  |                   |                            |
| Checking the temperature of people in workplaces                                                    |                       | .811              |                            |
| The sanitization carried out on trains and public transport                                         |                       | .757              |                            |
| The setting up of tent cities for infected people to be used in case of greater spread of the virus |                       | .661              |                            |
| The possibility only for close relatives to attend the funeral of a deceased                        |                       | .657              |                            |
| Checking the temperature of people at airports                                                      |                       | .498              |                            |
| The closure of museums in some municipalities                                                       |                       |                   | .822                       |
| The closure of schools and universities in some municipalities                                      |                       |                   | .773                       |
| The block of school trips                                                                           |                       |                   | .757                       |
| The blocking of public events (e.g. football matches) in some municipalities                        |                       |                   | .588                       |
| The closure of public exercises in some municipalities at certain time slots                        |                       |                   | .487                       |
| Eigenvalues                                                                                         | 4.80                  | 2.20              | 1.87                       |
| Explained variance                                                                                  | 30.0                  | 13.7              | 11.7                       |
| Mean                                                                                                | 4.98                  | 3.15              | 4.37                       |
| Cronbach's Alpha                                                                                    | .77                   | .77               | .77                        |

**Table S3.** EFA: Results and factors loadings of “Economic effects of COVID-19”.

| Item                                                                                             | Factor 1<br>Economic<br>effects | Factor 2<br>Price<br>increase |
|--------------------------------------------------------------------------------------------------|---------------------------------|-------------------------------|
| The estimates on economic decline due to coronavirus                                             | .828                            |                               |
| The difficulties of tourism due to coronavirus                                                   | .787                            |                               |
| The overall economic impact of coronavirus                                                       | .775                            |                               |
| The negative effect of coronavirus on work activities                                            | .740                            |                               |
| The stock market crash as a result of coronavirus                                                | .617                            |                               |
| The increase in purchases of safe-haven assets among investors on the stock exchange (e.g. gold) | .522                            |                               |
| The rising prices of anti-virus detergents                                                       |                                 | .937                          |
| The rising prices of protective masks                                                            |                                 | .931                          |
| Eigenvalues                                                                                      | 3.76                            | 1.36                          |
| Explained variance                                                                               | 47.0                            | 17.0                          |
| Mean                                                                                             | 4.37                            | 4.60                          |
| Cronbach's Alpha                                                                                 | .81                             | .90                           |

**Table S4.** EFA: Results and factors loadings of “Emotions”.

| Item                                                                                  | Factor 1<br>Fear | Factor 2<br>Trust in<br>authorities |
|---------------------------------------------------------------------------------------|------------------|-------------------------------------|
| I'm afraid that coronavirus can spread widely in my city/town                         | .914             |                                     |
| I'm afraid that coronavirus can spread widely in Italy                                | .911             |                                     |
| I'm afraid that coronavirus can infect any person I know                              | .904             |                                     |
| I'm afraid of being infected with coronavirus                                         | .887             |                                     |
| The Italian Regions can effectively face the coronavirus emergency                    |                  | .897                                |
| The Italian government has the competence to control the coronavirus emergency        |                  | .823                                |
| The Italian municipalities can adopt the right measures against coronavirus emergency |                  | .794                                |
| EU has the right means to face the coronavirus emergency                              |                  | .714                                |
| Eigenvalues                                                                           | 3.33             | 2.59                                |
| Explained variance                                                                    | 41.6             | 32.3                                |
| Mean                                                                                  | 3.42             | 3.26                                |
| Cronbach's Alpha                                                                      | .93              | .82                                 |

**Table S5.** EFA: Results and factors loadings of “Change in use of public spaces”.

| Item                                                                              | Factor 1<br>Change in use of<br>public spaces |
|-----------------------------------------------------------------------------------|-----------------------------------------------|
| I go to cinemas or theaters less often than before                                | .884                                          |
| I avoid staying in crowded places outdoors more than before                       | .850                                          |
| I go to restaurants or public places less often than before                       | .845                                          |
| I use public transport in a different way                                         | .789                                          |
| I have increased the purchase of groceries                                        | .746                                          |
| I have increased purchases of protective devices, e.g. face masks, sanitizing gel | .729                                          |
| I have decided to change my work habits                                           | .710                                          |
| I have changed my plans for business trips or holidays                            | .690                                          |
| Eigenvalues                                                                       | 4.91                                          |
| Explained variance                                                                | 61.4                                          |
| Mean                                                                              | 1.58                                          |
| Cronbach's Alpha                                                                  | .91                                           |
